# Supplementary material for: Negative differential resistance in oxidized zigzag graphene nanoribbons
Source: Royal Society of Chemistry journal article supplement (doi:10.1039/c0cp00828a), 2010-12-09
Supplement: c0cp00828a.pdf [file c0cp00828a.pdf]

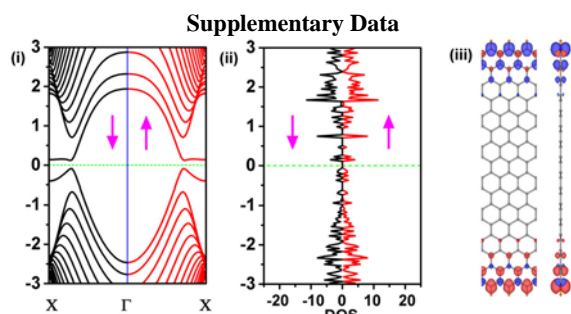

Fig. S 1 (i) Electronic spin-polarized band structures, (ii) projected density of states (DOS) and (iii) top- and side-view spin density plots of 16-ZGNR. The majority- (up-) spin bands are plotted at right parts with red color, while the minority- (down-) spin bands are plotted at left parts with black color. The up (or down) pink arrows denotes for up- (or down-) spin bands. Each band line is from  $\Gamma$  (0.0000, 0.0000, 0.0000) to X (0.5000, 0.0000, 0.0000). In projected DOS structures, the red (black) lines and blue (cyan) lines denote as the majority- (minority-) spin projected DOS of whole devices and oxygen atoms, respectively. The Fermi energy is set to zero. Isosurfaces of spin density ( $\pm 0.01 e/\text{\AA}^3$ ) are denoted by blue (positive) and red (negative) lobes.

Table S 1 Energy data of a set of n-ZGOs and n-ZGNR structures containing NM, FM and AFM states. Each total energy result is listed inside parentheses. The total energy differences of NM and AFM states are compared with corresponding FM ones. Each total magnetic moment is listed the value of corresponding favorable ground state.

| Structure       | NM<br>(meV/unit cell) | FM<br>(meV/unit cell) | AFM<br>(meV/ unit cell) |
|-----------------|-----------------------|-----------------------|-------------------------|
| <b>8-ZGO-0</b>  | 53.9<br>(-3378074.9)  | 0.0<br>(-3378128.8)   | 15.7<br>(-3378113.1)    |
| <b>12-ZGO-0</b> | 51.8<br>(-4620068.2)  | 0.0<br>(-4620120.0)   | 7.0<br>(-4620113.0)     |
| <b>16-ZGO-0</b> | 57.7<br>(-5862022.3)  | 0.0<br>(-5862080.0)   | 6.6<br>(-5862073.4)     |
| <b>16-ZGO-2</b> | 56.3<br>(-5862002.9)  | 0.0<br>(-5862059.2)   | 1.7<br>(-5862057.5)     |
| <b>20-ZGO-0</b> | 60.1<br>(-7103982.8)  | 0.0<br>(-7104042.9)   | 5.9<br>(-7104037.0)     |
| <b>12-ZGNR</b>  | 47.4<br>(-3755969.3)  | 0.0<br>(-3756016.7)   | -3.2<br>(-3756019.9)    |
| <b>16-ZGNR</b>  | 52.2<br>(-4997919.4)  | 0.0<br>(-4997971.6)   | -4.0<br>(-4997975.6)    |

**Optimized Atomic Coordinates (unit: Angstrom)**

**Coordinates for 16-ZGO-0 per unit cell**

|      |             |             |            |
|------|-------------|-------------|------------|
| C 1  | -0.00000036 | 9.84894580  | 5.00000119 |
| C 2  | -0.00000011 | 14.10671419 | 4.99999906 |
| C 3  | -0.00000026 | 18.35610828 | 5.00000041 |
| C 4  | -0.00000570 | 22.58248991 | 4.99999726 |
| C 5  | 0.00000069  | 27.59604006 | 5.00000047 |
| C 6  | -0.00000020 | 31.84965757 | 4.99999945 |
| C 7  | 0.00000015  | 36.10549486 | 4.99999994 |
| C 8  | 0.00000025  | 40.37959514 | 4.99999919 |
| C 9  | -0.00000017 | 8.41277871  | 5.00000141 |
| C 10 | -0.00000013 | 12.68679024 | 4.99999853 |
| C 11 | -0.00000011 | 16.94264793 | 5.00000087 |

|      |             |             |            |
|------|-------------|-------------|------------|
| C 12 | -0.00000157 | 21.19664007 | 4.99999778 |
| C 13 | -0.00000178 | 26.21034544 | 5.00000210 |
| C 14 | 0.00000038  | 30.43625093 | 5.00000177 |
| C 15 | -0.00000018 | 34.68556154 | 5.00000103 |
| C 16 | 0.00000043  | 38.94338622 | 4.99999863 |
| C 17 | 1.22999988  | 7.73015894  | 4.99999859 |
| C 18 | 1.22999990  | 11.97851962 | 4.99999980 |
| C 19 | 1.23000007  | 16.23275396 | 5.00000042 |
| C 20 | 1.22999876  | 20.47505250 | 5.00000127 |
| C 21 | 1.22999717  | 25.41123972 | 5.00000063 |
| C 22 | 1.23000064  | 29.72372957 | 5.00000061 |
| C 23 | 1.22999978  | 33.97660750 | 5.00000028 |
| C 24 | 1.23000052  | 38.23758384 | 5.00000099 |
| H 25 | 1.23000011  | 42.16823906 | 4.99999928 |
| H 26 | 1.22999997  | 6.62413720  | 4.99999892 |
| C 27 | 1.22999962  | 10.55476000 | 4.99999897 |
| C 28 | 1.22999987  | 14.81565657 | 5.00000149 |
| C 29 | 1.22999965  | 19.06871163 | 5.00000268 |
| C 30 | 1.22998259  | 23.38161821 | 4.99999969 |
| C 31 | 1.23000113  | 28.31747594 | 4.99999823 |
| C 32 | 1.22999984  | 32.55951345 | 5.00000086 |
| C 33 | 1.23000024  | 36.81376358 | 5.00000188 |
| C 34 | 1.23000028  | 41.06221765 | 4.99999811 |
| O 35 | 1.22998787  | 24.39665813 | 6.04026312 |
| O 36 | 1.22998779  | 24.39665815 | 3.95973701 |

**Coordinates for 16-ZGO-2 per unit cell**

|      |             |             |            |
|------|-------------|-------------|------------|
| C 1  | 1.23000039  | 8.35604679  | 5.00000044 |
| C 2  | 0.00000048  | 10.47617407 | 4.99999996 |
| H 3  | 1.22999994  | 7.24976548  | 5.00000033 |
| C 4  | 0.00000034  | 9.03912020  | 4.99999797 |
| C 5  | 1.23000062  | 11.18275504 | 5.00000175 |
| C 6  | 0.00000026  | 13.31727418 | 4.99999719 |
| C 7  | 1.23000034  | 12.60819534 | 5.00000004 |
| C 8  | -0.00000070 | 14.73960350 | 4.99999720 |
| C 9  | 1.22999960  | 16.86928537 | 5.00000129 |
| C 10 | -0.00000005 | 18.99681931 | 5.00000180 |
| C 11 | 1.22999334  | 21.12194629 | 4.99999929 |
| C 12 | -0.00000114 | 23.24498648 | 4.99999673 |
| C 13 | 1.22999911  | 15.44897711 | 4.99999961 |
| C 14 | -0.00000100 | 17.57811648 | 5.00000318 |
| C 15 | 1.22999520  | 19.70489765 | 5.00000221 |
| C 16 | -0.00001569 | 21.82956920 | 4.99999625 |
| C 17 | 1.22999494  | 23.95266163 | 5.00000048 |
| C 18 | -0.00000127 | 26.07512591 | 5.00000120 |
| C 19 | 1.22999969  | 25.36651987 | 5.00000251 |
| C 20 | -0.00000083 | 27.48648652 | 5.00000105 |
| C 21 | 1.22999701  | 29.60344954 | 4.99999758 |
| C 22 | -0.00000907 | 31.70992476 | 5.00000269 |
| C 23 | 1.22998674  | 34.53908412 | 5.00000630 |
| C 24 | -0.00000515 | 36.72642255 | 5.00000120 |
| C 25 | 1.22999842  | 28.19822656 | 4.99999843 |
| C 26 | -0.00000395 | 30.32459464 | 4.99999843 |
| C 27 | 1.22998826  | 32.50869163 | 5.00000595 |
| C 28 | -0.00001147 | 35.33828508 | 5.00000532 |
| C 29 | 1.22999525  | 37.44738409 | 4.99999686 |
| C 30 | -0.00000086 | 39.56980268 | 4.99999836 |
| C 31 | 1.22999870  | 38.86005914 | 4.99999574 |
| C 32 | 0.00000028  | 41.00218072 | 5.00000164 |
| H 33 | 1.23000027  | 42.79247921 | 5.00000232 |
| C 34 | 1.23000038  | 41.68644052 | 5.00000387 |
| O 35 | 1.22997672  | 33.52393647 | 6.04075955 |
| O 36 | 1.22998264  | 33.52393943 | 3.95925416 |
